# Supplementary material for: Development of a multi-method chronology spanning the Last Glacial Interval from Orakei maar lake, Auckland, New Zealand
Source: Copernicus journal article supplement (doi:10.5194/gchron-2-367-2020), 2020-12-15
Supplement: Supplementary file 1 [file gchron-2-367-2020-supplement.zip]

Archive with 2 entries (2 files):
- OrakeiChronology_Supplement.txt
- gchron-2-367-2020-supplement-title-page.pdf
