# Supplementary material for: Development of a multi-method chronology spanning the Last Glacial Interval from Orakei maar lake, Auckland, New Zealand
Source: Copernicus journal article supplement (doi:10.5194/gchron-2-367-2020), 2020-12-15
Supplement: Supplementary file 1 [file gchron-2-367-2020-supplement.zip › gchron-2-367-2020-supplement-title-page.pdf]

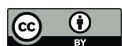

## *Supplement of*

# **Development of a multi-method chronology spanning the Last Glacial Interval from Orakei maar lake, Auckland, New Zealand**

**Leonie Peti et al.**

*Correspondence to:* Leonie Peti (lpet986@aucklanduni.ac.nz)

- [gchron-2-367-2020-supplement-title-page.pdf](#)
- [OrakeiChronology\\_Supplement.txt](#)

The copyright of individual parts of the supplement might differ from the CC BY 4.0 License.
