# Supplementary material for: Development of a multi-method chronology spanning the Last Glacial Interval from Orakei maar lake, Auckland, New Zealand
Source: Copernicus journal article supplement (doi:10.5194/gchron-2-367-2020), 2020-12-15
Supplement: Supplementary file 1 [file gchron-2-367-2020-supplement.zip › OrakeiChronology_Supplement.txt]

Age-depth relationship of the Orakei maar lake sediment sequence
Supplement to: "Development of a multi-method chronology spanning the Last Glacial Interval from Orakei maar lake, Auckland, New Zealand"
Leonie Peti, Kathryn E. Fitzsimmons, Jenni L. Hopkins, Andreas Nilsson, Toshiyuki Fujioka, David Fink, Charles Mifsud, Marcus Christl, Raimund Muscheler, Paul C. Augustinus
ECD (m)	minimum of 95% confidence range (cal years BP)	maximum of 95% confidence range (cal years BP)	median of 95% confidence range (cal years BP)	age model mean (cal years BP)
0	9367	10126	9898	9852
0.01	9381	10132	9915	9867
0.02	9394	10138	9929	9882
0.03	9405	10148	9945	9896
0.04	9416	10159	9960	9911
0.05	9429	10171	9975	9925
0.06	9441	10180	9990	9940
0.07	9451	10187	10005	9954
0.08	9465	10196	10022	9969
0.09	9475	10207	10038	9983
0.1	9485	10217	10054	9997
0.11	9507	10226	10073	10020
0.12	9534	10237	10094	10042
0.13	9571	10260	10112	10064
0.14	9609	10288	10129	10086
0.15	9643	10325	10147	10109
0.16	9731	10335	10167	10137
0.17	9822	10352	10188	10165
0.18	9906	10373	10207	10194
0.19	9985	10402	10228	10222
0.2	10043	10437	10250	10251
0.21	10103	10455	10272	10278
0.22	10148	10477	10296	10305
0.23	10176	10507	10327	10333
0.24	10199	10555	10354	10360
0.25	10212	10616	10379	10387
0.26	10235	10640	10407	10414
0.27	10253	10668	10435	10440
0.28	10266	10704	10463	10466
0.29	10275	10749	10488	10493
0.3	10283	10803	10513	10519
0.31	10307	10824	10541	10545
0.32	10324	10850	10569	10572
0.33	10340	10886	10595	10598
0.34	10357	10925	10620	10624
0.35	10365	10974	10644	10650
0.36	10397	10984	10669	10675
0.37	10423	11002	10695	10700
0.38	10439	11023	10722	10725
0.39	10456	11048	10747	10750
0.4	10471	11079	10772	10775
0.41	10509	11095	10799	10802
0.42	10535	11114	10827	10828
0.43	10557	11138	10854	10854
0.44	10572	11169	10880	10880
0.45	10581	11205	10907	10907
0.46	10610	11219	10930	10930
0.47	10639	11237	10955	10953
0.48	10663	11257	10981	10977
0.49	10684	11281	11006	11000
0.5	10700	11309	11031	11024
0.51	10746	11322	11057	11050
0.52	10784	11338	11083	11077
0.53	10815	11359	11110	11103
0.54	10839	11384	11139	11130
0.55	10862	11414	11167	11157
0.56	10937	11427	11190	11186
0.57	11008	11440	11214	11215
0.58	11071	11456	11236	11244
0.59	11125	11474	11261	11273
0.6	11160	11498	11287	11303
0.61	11204	11506	11305	11323
0.62	11239	11517	11325	11344
0.63	11253	11534	11348	11365
0.64	11263	11556	11372	11385
0.65	11270	11584	11396	11406
0.66	11290	11590	11418	11425
0.67	11303	11598	11440	11443
0.68	11313	11610	11462	11462
0.69	11320	11632	11481	11481
0.7	11326	11666	11501	11500
0.71	11353	11680	11525	11523
0.72	11373	11699	11552	11546
0.73	11387	11726	11577	11570
0.74	11399	11765	11601	11593
0.75	11409	11810	11622	11617
0.76	11442	11824	11645	11640
0.77	11467	11839	11669	11664
0.78	11484	11861	11693	11687
0.79	11498	11885	11716	11710
0.8	11512	11920	11739	11734
0.81	11558	11930	11762	11758
0.82	11599	11943	11787	11783
0.83	11624	11959	11813	11807
0.84	11641	11982	11839	11831
0.85	11654	12010	11864	11856
0.86	11675	12025	11882	11873
0.87	11693	12047	11897	11889
0.88	11711	12071	11912	11906
0.89	11725	12101	11926	11923
0.9	11736	12136	11940	11939
0.91	11759	12148	11958	11956
0.92	11778	12164	11974	11973
0.93	11794	12182	11991	11990
0.94	11809	12205	12006	12007
0.95	11821	12237	12022	12024
0.96	11845	12250	12039	12041
0.97	11864	12263	12056	12057
0.98	11882	12281	12072	12074
0.99	11899	12299	12088	12091
1	11910	12323	12104	12108
1.01	11932	12333	12122	12125
1.02	11951	12346	12142	12141
1.03	11966	12360	12161	12157
1.04	11978	12380	12180	12173
1.05	11989	12403	12194	12190
1.06	12002	12412	12206	12203
1.07	12011	12429	12217	12216
1.08	12020	12447	12228	12229
1.09	12028	12466	12238	12242
1.1	12035	12492	12248	12255
1.11	12049	12504	12261	12268
1.12	12061	12520	12273	12281
1.13	12070	12540	12284	12294
1.14	12078	12564	12296	12307
1.15	12085	12585	12308	12320
1.16	12098	12599	12319	12333
1.17	12110	12613	12328	12345
1.18	12123	12626	12336	12358
1.19	12133	12640	12344	12370
1.2	12146	12656	12354	12383
1.21	12156	12663	12366	12392
1.22	12167	12671	12378	12402
1.23	12177	12677	12392	12411
1.24	12185	12688	12405	12421
1.25	12192	12697	12419	12430
1.26	12202	12703	12428	12439
1.27	12213	12710	12439	12449
1.28	12224	12717	12450	12458
1.29	12232	12724	12463	12467
1.3	12238	12732	12474	12476
1.31	12251	12737	12483	12485
1.32	12261	12743	12494	12495
1.33	12271	12749	12505	12504
1.34	12277	12755	12515	12513
1.35	12284	12763	12526	12522
1.36	12297	12770	12535	12532
1.37	12309	12776	12545	12541
1.38	12316	12784	12554	12550
1.39	12324	12795	12564	12559
1.4	12332	12805	12575	12569
1.41	12344	12811	12583	12578
1.42	12355	12816	12593	12587
1.43	12363	12821	12602	12596
1.44	12372	12829	12611	12605
1.45	12381	12838	12621	12614
1.46	12395	12843	12630	12624
1.47	12407	12849	12640	12633
1.48	12416	12856	12649	12643
1.49	12424	12864	12659	12652
1.5	12433	12874	12668	12661
1.51	12446	12878	12677	12671
1.52	12456	12886	12686	12680
1.53	12466	12893	12695	12689
1.54	12474	12901	12705	12699
1.55	12482	12911	12714	12708
1.56	12495	12916	12724	12717
1.57	12506	12922	12734	12727
1.58	12519	12930	12742	12736
1.59	12530	12937	12751	12746
1.6	12539	12945	12761	12755
1.61	12553	12951	12770	12765
1.62	12564	12957	12780	12774
1.63	12576	12964	12789	12783
1.64	12586	12972	12799	12793
1.65	12595	12981	12808	12802
1.66	12609	12985	12817	12812
1.67	12620	12990	12827	12821
1.68	12632	12996	12835	12830
1.69	12643	13005	12845	12840
1.7	12650	13015	12855	12849
1.71	12666	13019	12863	12858
1.72	12679	13024	12872	12868
1.73	12688	13030	12882	12877
1.74	12700	13038	12891	12886
1.75	12710	13045	12900	12895
1.76	12726	13051	12909	12905
1.77	12739	13055	12919	12914
1.78	12752	13060	12929	12923
1.79	12761	13067	12938	12933
1.8	12773	13075	12947	12942
1.81	12791	13079	12956	12951
1.82	12808	13085	12964	12961
1.83	12822	13091	12973	12970
1.84	12834	13098	12982	12980
1.85	12842	13108	12992	12989
1.86	12853	13115	13001	12998
1.87	12862	13120	13009	13007
1.88	12872	13130	13018	13016
1.89	12881	13142	13027	13025
1.9	12889	13156	13036	13033
1.91	12901	13162	13044	13041
1.92	12911	13169	13052	13049
1.93	12920	13177	13060	13057
1.94	12929	13185	13068	13065
1.95	12936	13196	13076	13073
1.96	12946	13202	13085	13081
1.97	12954	13208	13092	13089
1.98	12962	13217	13101	13097
1.99	12969	13226	13108	13105
2	12974	13239	13116	13113
2.01	12984	13245	13124	13121
2.02	12993	13251	13132	13129
2.03	13001	13258	13140	13137
2.04	13008	13266	13148	13145
2.05	13014	13277	13156	13153
2.06	13024	13281	13164	13161
2.07	13034	13288	13172	13169
2.08	13042	13295	13181	13177
2.09	13048	13304	13189	13185
2.1	13054	13312	13197	13193
2.11	13066	13317	13204	13201
2.12	13076	13322	13212	13208
2.13	13084	13328	13220	13216
2.14	13092	13335	13228	13224
2.15	13099	13346	13236	13232
2.16	13110	13351	13244	13240
2.17	13120	13357	13252	13247
2.18	13129	13364	13260	13255
2.19	13137	13372	13268	13263
2.2	13144	13380	13276	13271
2.21	13155	13385	13284	13279
2.22	13166	13390	13292	13287
2.23	13174	13397	13300	13294
2.24	13180	13403	13308	13302
2.25	13186	13412	13315	13310
2.26	13193	13417	13322	13317
2.27	13200	13422	13328	13324
2.28	13207	13430	13335	13331
2.29	13213	13439	13342	13337
2.3	13220	13448	13348	13344
2.31	13228	13453	13354	13350
2.32	13236	13459	13360	13356
2.33	13243	13465	13366	13362
2.34	13250	13473	13371	13368
2.35	13255	13482	13377	13375
2.36	13262	13487	13383	13381
2.37	13269	13494	13389	13387
2.38	13275	13500	13395	13393
2.39	13281	13508	13400	13399
2.4	13284	13516	13407	13405
2.41	13292	13520	13412	13411
2.42	13299	13525	13418	13417
2.43	13305	13531	13424	13423
2.44	13311	13538	13429	13429
2.45	13316	13545	13435	13435
2.46	13324	13551	13441	13441
2.47	13331	13555	13447	13447
2.48	13339	13560	13453	13453
2.49	13344	13567	13459	13459
2.5	13349	13575	13465	13465
2.51	13358	13581	13470	13471
2.52	13365	13587	13476	13477
2.53	13371	13592	13482	13483
2.54	13377	13599	13488	13490
2.55	13382	13606	13494	13496
2.56	13392	13612	13499	13502
2.57	13401	13621	13505	13507
2.58	13407	13628	13511	13513
2.59	13413	13634	13517	13519
2.6	13418	13643	13522	13525
2.61	13424	13650	13530	13533
2.62	13428	13658	13541	13540
2.63	13433	13668	13552	13548
2.64	13439	13685	13560	13555
2.65	13444	13698	13567	13563
2.66	13451	13706	13575	13571
2.67	13458	13716	13581	13578
2.68	13464	13726	13588	13586
2.69	13469	13739	13596	13594
2.7	13474	13756	13602	13602
2.71	13482	13761	13610	13610
2.72	13489	13769	13618	13618
2.73	13495	13779	13625	13625
2.74	13500	13788	13632	13633
2.75	13504	13800	13639	13641
2.76	13511	13808	13647	13648
2.77	13518	13815	13654	13656
2.78	13524	13824	13661	13663
2.79	13529	13832	13668	13671
2.8	13533	13843	13676	13678
2.81	13540	13851	13684	13686
2.82	13546	13859	13691	13694
2.83	13553	13868	13699	13701
2.84	13558	13877	13706	13709
2.85	13563	13889	13713	13716
2.86	13571	13896	13721	13724
2.87	13579	13904	13728	13732
2.88	13584	13912	13736	13739
2.89	13589	13921	13743	13747
2.9	13595	13931	13751	13755
2.91	13603	13938	13758	13762
2.92	13609	13946	13766	13770
2.93	13615	13956	13773	13777
2.94	13620	13968	13781	13785
2.95	13624	13981	13789	13793
2.96	13632	13988	13796	13800
2.97	13638	13995	13804	13808
2.98	13644	14003	13811	13816
2.99	13650	14014	13820	13823
3	13656	14025	13827	13831
3.01	13663	14031	13835	13839
3.02	13669	14040	13843	13847
3.03	13676	14049	13851	13854
3.04	13682	14060	13859	13862
3.05	13689	14070	13866	13870
3.06	13697	14078	13873	13877
3.07	13704	14086	13881	13885
3.08	13711	14093	13889	13892
3.09	13718	14102	13897	13900
3.1	13724	14112	13904	13908
3.11	13733	14118	13912	13915
3.12	13740	14125	13919	13923
3.13	13747	14132	13927	13930
3.14	13751	14139	13934	13938
3.15	13757	14149	13942	13946
3.16	13766	14158	13950	13953
3.17	13772	14165	13958	13961
3.18	13776	14174	13965	13968
3.19	13784	14182	13973	13976
3.2	13788	14192	13981	13984
3.21	13796	14201	13989	13991
3.22	13803	14208	13997	13999
3.23	13808	14216	14005	14007
3.24	13816	14226	14012	14014
3.25	13822	14238	14019	14022
3.26	13830	14246	14027	14030
3.27	13836	14253	14035	14038
3.28	13845	14261	14043	14045
3.29	13851	14270	14050	14053
3.3	13855	14278	14058	14061
3.31	13866	14286	14066	14069
3.32	13872	14293	14074	14076
3.33	13879	14302	14081	14084
3.34	13886	14311	14088	14092
3.35	13891	14321	14096	14100
3.36	13900	14328	14104	14107
3.37	13907	14335	14112	14115
3.38	13915	14341	14120	14122
3.39	13922	14350	14128	14130
3.4	13930	14358	14136	14138
3.41	13939	14366	14143	14145
3.42	13946	14373	14150	14153
3.43	13952	14379	14158	14160
3.44	13960	14387	14165	14168
3.45	13965	14396	14172	14175
3.46	13975	14402	14180	14183
3.47	13983	14411	14188	14191
3.48	13991	14418	14196	14198
3.49	13997	14426	14203	14206
3.5	14002	14435	14211	14213
3.51	14010	14442	14219	14221
3.52	14019	14448	14226	14228
3.53	14026	14455	14234	14236
3.54	14033	14463	14241	14243
3.55	14040	14471	14249	14251
3.56	14048	14478	14256	14258
3.57	14055	14485	14264	14266
3.58	14061	14493	14272	14274
3.59	14069	14502	14280	14281
3.6	14074	14512	14288	14289
3.61	14083	14517	14295	14296
3.62	14090	14523	14303	14304
3.63	14098	14534	14310	14312
3.64	14105	14543	14318	14319
3.65	14111	14553	14325	14327
3.66	14119	14559	14333	14335
3.67	14127	14565	14340	14342
3.68	14135	14573	14348	14350
3.69	14140	14582	14356	14357
3.7	14147	14591	14364	14365
3.71	14157	14595	14371	14372
3.72	14165	14600	14379	14380
3.73	14171	14607	14386	14387
3.74	14176	14617	14394	14395
3.75	14182	14627	14401	14402
3.76	14193	14634	14409	14410
3.77	14201	14641	14417	14418
3.78	14209	14648	14425	14426
3.79	14217	14655	14432	14433
3.8	14223	14663	14441	14441
3.81	14232	14669	14448	14449
3.82	14240	14677	14456	14456
3.83	14246	14685	14464	14464
3.84	14253	14693	14471	14472
3.85	14261	14702	14479	14479
3.86	14270	14708	14486	14487
3.87	14281	14716	14494	14495
3.88	14287	14723	14502	14502
3.89	14294	14731	14510	14510
3.9	14301	14744	14518	14518
3.91	14310	14749	14525	14525
3.92	14318	14756	14533	14533
3.93	14324	14763	14540	14540
3.94	14331	14768	14547	14548
3.95	14337	14775	14554	14555
3.96	14347	14782	14562	14563
3.97	14356	14789	14570	14571
3.98	14362	14796	14577	14578
3.99	14368	14805	14585	14586
4	14374	14813	14593	14593
4.01	14382	14818	14600	14601
4.02	14392	14823	14607	14609
4.03	14401	14830	14615	14616
4.04	14410	14838	14623	14624
4.05	14416	14846	14631	14631
4.06	14426	14853	14638	14639
4.07	14434	14859	14645	14646
4.08	14443	14865	14652	14654
4.09	14450	14874	14660	14661
4.1	14456	14882	14667	14669
4.11	14467	14888	14675	14676
4.12	14475	14895	14683	14684
4.13	14482	14902	14690	14692
4.14	14489	14910	14698	14699
4.15	14496	14916	14705	14707
4.16	14508	14922	14712	14715
4.17	14517	14929	14720	14722
4.18	14525	14937	14728	14730
4.19	14533	14944	14735	14738
4.2	14538	14954	14743	14745
4.21	14550	14960	14750	14753
4.22	14561	14966	14757	14761
4.23	14570	14974	14764	14768
4.24	14578	14981	14772	14776
4.25	14585	14988	14780	14783
4.26	14596	14995	14787	14791
4.27	14606	15001	14793	14799
4.28	14616	15010	14801	14807
4.29	14622	15019	14808	14814
4.3	14629	15029	14816	14822
4.31	14640	15037	14824	14830
4.32	14651	15045	14833	14839
4.33	14658	15053	14842	14847
4.34	14665	15063	14851	14856
4.35	14672	15074	14860	14864
4.36	14681	15082	14869	14873
4.37	14690	15091	14878	14882
4.38	14698	15099	14888	14891
4.39	14707	15110	14896	14900
4.4	14714	15124	14905	14909
4.41	14725	15131	14915	14918
4.42	14733	15140	14924	14928
4.43	14741	15149	14934	14937
4.44	14749	15158	14943	14946
4.45	14756	15170	14953	14955
4.46	14766	15178	14962	14964
4.47	14775	15187	14970	14973
4.48	14782	15198	14979	14982
4.49	14788	15208	14989	14991
4.5	14793	15219	14997	15000
4.51	14803	15228	15007	15009
4.52	14812	15237	15016	15018
4.53	14821	15247	15025	15027
4.54	14830	15259	15034	15037
4.55	14837	15274	15044	15046
4.56	14847	15279	15052	15055
4.57	14855	15286	15062	15064
4.58	14862	15295	15071	15073
4.59	14870	15305	15080	15082
4.6	14876	15317	15089	15091
4.61	14886	15323	15098	15100
4.62	14895	15332	15108	15109
4.63	14905	15341	15117	15118
4.64	14914	15352	15126	15127
4.65	14922	15364	15135	15137
4.66	14932	15370	15144	15146
4.67	14940	15377	15153	15155
4.68	14948	15386	15162	15163
4.69	14955	15395	15171	15172
4.7	14963	15404	15180	15181
4.71	14971	15411	15189	15190
4.72	14980	15420	15197	15199
4.73	14990	15429	15207	15208
4.74	14997	15439	15216	15217
4.75	15004	15451	15226	15226
4.76	15013	15458	15234	15236
4.77	15023	15466	15243	15245
4.78	15034	15475	15253	15254
4.79	15042	15486	15263	15264
4.8	15050	15497	15273	15273
4.81	15061	15505	15282	15282
4.82	15072	15511	15290	15291
4.83	15081	15520	15299	15300
4.84	15090	15529	15308	15309
4.85	15096	15538	15317	15318
4.86	15108	15545	15326	15327
4.87	15120	15554	15335	15337
4.88	15127	15563	15345	15346
4.89	15136	15573	15354	15355
4.9	15143	15582	15364	15364
4.91	15156	15589	15373	15374
4.92	15166	15597	15383	15383
4.93	15175	15606	15393	15393
4.94	15183	15616	15403	15402
4.95	15189	15627	15412	15412
4.96	15200	15632	15421	15421
4.97	15211	15639	15431	15430
4.98	15222	15648	15440	15439
4.99	15231	15659	15450	15449
5	15238	15670	15459	15458
5.01	15249	15675	15469	15467
5.02	15258	15683	15478	15477
5.03	15268	15691	15487	15486
5.04	15277	15702	15497	15495
5.05	15284	15714	15506	15505
5.06	15296	15721	15515	15514
5.07	15308	15727	15524	15523
5.08	15317	15735	15533	15532
5.09	15326	15745	15542	15541
5.1	15333	15756	15552	15550
5.11	15346	15762	15561	15559
5.12	15357	15770	15570	15568
5.13	15367	15777	15580	15577
5.14	15376	15788	15589	15587
5.15	15384	15797	15599	15596
5.16	15397	15802	15608	15605
5.17	15406	15809	15617	15614
5.18	15416	15818	15626	15623
5.19	15426	15826	15635	15632
5.2	15434	15837	15643	15641
5.21	15444	15842	15652	15650
5.22	15455	15848	15662	15660
5.23	15466	15856	15671	15669
5.24	15475	15866	15680	15678
5.25	15481	15877	15689	15688
5.26	15493	15883	15699	15697
5.27	15503	15891	15707	15706
5.28	15511	15899	15717	15715
5.29	15518	15910	15727	15725
5.3	15527	15920	15736	15734
5.31	15539	15926	15746	15743
5.32	15548	15934	15756	15753
5.33	15557	15942	15765	15762
5.34	15564	15951	15775	15771
5.35	15572	15962	15784	15781
5.36	15586	15969	15793	15790
5.37	15597	15976	15803	15799
5.38	15608	15985	15813	15809
5.39	15617	15995	15822	15818
5.4	15625	16007	15831	15828
5.41	15639	16013	15840	15837
5.42	15650	16021	15849	15846
5.43	15661	16029	15860	15855
5.44	15670	16037	15869	15864
5.45	15677	16047	15878	15874
5.46	15687	16054	15886	15882
5.47	15699	16060	15895	15891
5.48	15708	16068	15904	15900
5.49	15715	16076	15913	15909
5.5	15722	16087	15922	15917
5.51	15733	16092	15929	15924
5.52	15739	16098	15937	15932
5.53	15744	16104	15944	15939
5.54	15750	16111	15952	15946
5.55	15755	16119	15959	15953
5.56	15763	16126	15966	15960
5.57	15770	16133	15974	15967
5.58	15776	16139	15982	15974
5.59	15782	16146	15989	15981
5.6	15787	16156	15996	15988
5.61	15795	16161	16003	15995
5.62	15802	16165	16009	16001
5.63	15808	16173	16016	16008
5.64	15814	16179	16023	16014
5.65	15821	16186	16029	16021
5.66	15827	16191	16034	16026
5.67	15832	16197	16040	16032
5.68	15838	16203	16046	16038
5.69	15843	16211	16051	16044
5.7	15847	16218	16057	16050
5.71	15853	16222	16063	16055
5.72	15859	16227	16069	16061
5.73	15864	16233	16074	16067
5.74	15868	16240	16079	16072
5.75	15873	16246	16085	16078
5.76	15878	16251	16091	16084
5.77	15883	16256	16096	16089
5.78	15889	16262	16102	16095
5.79	15894	16267	16107	16101
5.8	15898	16274	16113	16106
5.81	15903	16278	16117	16111
5.82	15905	16285	16122	16116
5.83	15909	16291	16127	16121
5.84	15912	16296	16132	16126
5.85	15917	16303	16137	16131
5.86	15922	16308	16141	16136
5.87	15926	16314	16147	16141
5.88	15932	16321	16151	16146
5.89	15936	16327	16156	16151
5.9	15940	16335	16162	16156
5.91	15945	16339	16167	16161
5.92	15951	16345	16171	16166
5.93	15956	16350	16176	16171
5.94	15960	16357	16181	16176
5.95	15965	16363	16186	16181
5.96	15968	16370	16191	16186
5.97	15973	16375	16196	16191
5.98	15979	16381	16201	16196
5.99	15984	16387	16206	16201
6	15988	16393	16211	16206
6.01	15992	16398	16216	16211
6.02	15998	16405	16221	16216
6.03	16003	16411	16226	16221
6.04	16007	16418	16231	16226
6.05	16011	16423	16236	16231
6.06	16016	16429	16241	16236
6.07	16020	16436	16246	16241
6.08	16025	16441	16251	16246
6.09	16029	16447	16256	16251
6.1	16033	16453	16261	16256
6.11	16038	16458	16265	16261
6.12	16044	16463	16271	16267
6.13	16049	16470	16276	16272
6.14	16054	16475	16280	16277
6.15	16059	16482	16286	16282
6.16	16063	16487	16291	16287
6.17	16068	16491	16296	16292
6.18	16073	16497	16301	16297
6.19	16076	16503	16306	16302
6.2	16081	16510	16311	16307
6.21	16087	16515	16316	16312
6.22	16091	16522	16321	16317
6.23	16097	16526	16326	16322
6.24	16102	16531	16331	16327
6.25	16107	16538	16336	16332
6.26	16111	16543	16341	16337
6.27	16117	16548	16346	16342
6.28	16123	16554	16350	16347
6.29	16126	16561	16355	16352
6.3	16131	16568	16360	16357
6.31	16135	16572	16365	16362
6.32	16140	16576	16370	16367
6.33	16144	16583	16375	16372
6.34	16148	16590	16381	16377
6.35	16152	16596	16386	16382
6.36	16157	16601	16391	16387
6.37	16162	16605	16397	16392
6.38	16167	16612	16402	16397
6.39	16170	16617	16407	16402
6.4	16174	16623	16412	16408
6.41	16179	16629	16417	16413
6.42	16183	16634	16422	16418
6.43	16188	16641	16427	16423
6.44	16192	16646	16432	16428
6.45	16196	16654	16437	16433
6.46	16201	16658	16442	16438
6.47	16205	16662	16447	16443
6.48	16211	16669	16452	16448
6.49	16215	16675	16457	16453
6.5	16220	16684	16462	16458
6.51	16225	16689	16467	16463
6.52	16230	16693	16472	16468
6.53	16235	16700	16477	16473
6.54	16240	16706	16482	16478
6.55	16243	16714	16487	16483
6.56	16248	16718	16492	16488
6.57	16252	16724	16497	16493
6.58	16256	16728	16502	16498
6.59	16261	16735	16507	16503
6.6	16265	16742	16512	16508
6.61	16271	16747	16517	16514
6.62	16275	16752	16522	16519
6.63	16279	16759	16527	16524
6.64	16285	16765	16532	16529
6.65	16287	16773	16536	16534
6.66	16294	16778	16542	16539
6.67	16299	16782	16547	16544
6.68	16305	16788	16552	16549
6.69	16310	16794	16557	16554
6.7	16314	16802	16562	16559
6.71	16319	16806	16567	16564
6.72	16324	16812	16572	16569
6.73	16328	16818	16577	16574
6.74	16331	16823	16582	16579
6.75	16336	16829	16587	16585
6.76	16341	16834	16592	16589
6.77	16345	16839	16597	16594
6.78	16349	16844	16602	16599
6.79	16353	16849	16607	16604
6.8	16357	16856	16612	16609
6.81	16361	16860	16616	16614
6.82	16366	16866	16621	16619
6.83	16369	16872	16626	16624
6.84	16374	16877	16631	16629
6.85	16379	16884	16637	16634
6.86	16383	16889	16641	16639
6.87	16387	16894	16646	16644
6.88	16392	16899	16651	16649
6.89	16397	16906	16656	16654
6.9	16399	16914	16661	16660
6.91	16406	16917	16666	16665
6.92	16413	16922	16671	16670
6.93	16419	16926	16676	16675
6.94	16424	16932	16681	16680
6.95	16429	16937	16686	16685
6.96	16433	16942	16691	16690
6.97	16437	16947	16696	16695
6.98	16440	16953	16701	16700
6.99	16443	16960	16707	16705
7	16447	16967	16711	16710
7.01	16452	16970	16717	16715
7.02	16458	16975	16722	16720
7.03	16462	16980	16727	16725
7.04	16468	16985	16732	16730
7.05	16473	16990	16736	16735
7.06	16477	16995	16741	16740
7.07	16483	17001	16746	16745
7.08	16489	17008	16751	16750
7.09	16492	17013	16756	16755
7.1	16497	17018	16762	16760
7.11	16502	17022	16767	16765
7.12	16507	17028	16771	16770
7.13	16511	17035	16777	16775
7.14	16516	17040	16781	16780
7.15	16519	17046	16787	16785
7.16	16524	17050	16791	16790
7.17	16529	17056	16796	16795
7.18	16535	17061	16801	16800
7.19	16540	17067	16806	16805
7.2	16544	17072	16811	16810
7.21	16551	17076	16815	16815
7.22	16556	17081	16821	16820
7.23	16560	17088	16826	16826
7.24	16564	17094	16831	16831
7.25	16567	17101	16836	16836
7.26	16574	17105	16841	16841
7.27	16579	17110	16845	16846
7.28	16584	17115	16850	16851
7.29	16588	17121	16855	16856
7.3	16592	17127	16860	16861
7.31	16597	17131	16866	16866
7.32	16602	17137	16871	16871
7.33	16606	17144	16876	16876
7.34	16611	17149	16882	16882
7.35	16615	17155	16886	16887
7.36	16621	17161	16892	16892
7.37	16626	17166	16896	16897
7.38	16630	17170	16901	16902
7.39	16634	17177	16906	16907
7.4	16638	17182	16910	16912
7.41	16643	17185	16915	16917
7.42	16647	17191	16920	16922
7.43	16652	17196	16925	16927
7.44	16655	17201	16930	16932
7.45	16659	17207	16936	16937
7.46	16665	17213	16941	16942
7.47	16671	17217	16947	16947
7.48	16676	17223	16952	16952
7.49	16681	17229	16957	16957
7.5	16684	17235	16962	16962
7.51	16689	17240	16968	16967
7.52	16694	17244	16973	16972
7.53	16698	17251	16977	16977
7.54	16703	17257	16982	16982
7.55	16708	17265	16988	16987
7.56	16715	17268	16992	16992
7.57	16720	17273	16997	16997
7.58	16723	17279	17002	17002
7.59	16725	17284	17006	17008
7.6	16730	17289	17012	17013
7.61	16737	17295	17017	17018
7.62	16741	17301	17021	17023
7.63	16745	17307	17026	17028
7.64	16750	17314	17031	17033
7.65	16754	17320	17036	17038
7.66	16760	17326	17042	17043
7.67	16765	17332	17046	17048
7.68	16769	17336	17052	17053
7.69	16774	17340	17056	17058
7.7	16778	17347	17061	17063
7.71	16784	17353	17067	17068
7.72	16787	17359	17071	17073
7.73	16791	17364	17076	17078
7.74	16796	17369	17082	17083
7.75	16800	17373	17087	17088
7.76	16806	17380	17091	17093
7.77	16812	17387	17097	17098
7.78	16817	17394	17102	17104
7.79	16823	17400	17108	17109
7.8	16827	17406	17113	17114
7.81	16833	17409	17117	17119
7.82	16836	17414	17122	17124
7.83	16840	17419	17127	17129
7.84	16845	17426	17132	17134
7.85	16850	17433	17137	17139
7.86	16855	17441	17142	17144
7.87	16859	17446	17147	17149
7.88	16865	17451	17152	17154
7.89	16870	17456	17157	17159
7.9	16874	17460	17162	17164
7.91	16879	17466	17167	17169
7.92	16883	17472	17173	17174
7.93	16888	17478	17179	17179
7.94	16892	17485	17184	17185
7.95	16897	17491	17189	17190
7.96	16904	17495	17194	17195
7.97	16909	17499	17199	17200
7.98	16914	17504	17204	17205
7.99	16919	17509	17208	17210
8	16923	17515	17213	17215
8.01	16928	17520	17218	17220
8.02	16932	17526	17223	17225
8.03	16938	17530	17228	17230
8.04	16942	17537	17233	17235
8.05	16946	17543	17238	17240
8.06	16952	17548	17243	17245
8.07	16958	17553	17248	17250
8.08	16962	17557	17253	17255
8.09	16967	17563	17258	17260
8.1	16971	17568	17263	17265
8.11	16978	17572	17268	17270
8.12	16983	17577	17273	17275
8.13	16988	17582	17278	17280
8.14	16992	17588	17283	17285
8.15	16996	17594	17288	17290
8.16	17002	17599	17294	17295
8.17	17007	17604	17299	17300
8.18	17011	17608	17304	17305
8.19	17016	17614	17309	17310
8.2	17021	17620	17314	17315
8.21	17025	17625	17319	17320
8.22	17031	17631	17324	17325
8.23	17036	17637	17329	17330
8.24	17041	17642	17334	17335
8.25	17046	17649	17340	17340
8.26	17050	17655	17345	17345
8.27	17054	17660	17349	17350
8.28	17059	17666	17354	17355
8.29	17063	17671	17359	17360
8.3	17066	17676	17364	17365
8.31	17071	17681	17369	17370
8.32	17077	17685	17374	17375
8.33	17082	17688	17379	17380
8.34	17087	17693	17384	17385
8.35	17091	17698	17389	17390
8.36	17096	17704	17394	17395
8.37	17101	17712	17398	17400
8.38	17108	17717	17403	17405
8.39	17112	17723	17408	17410
8.4	17116	17727	17412	17415
8.41	17122	17733	17417	17420
8.42	17126	17738	17423	17425
8.43	17132	17746	17428	17430
8.44	17136	17752	17433	17435
8.45	17139	17757	17438	17440
8.46	17144	17762	17443	17445
8.47	17148	17767	17448	17450
8.48	17152	17774	17453	17455
8.49	17156	17780	17457	17460
8.5	17160	17784	17461	17465
8.51	17166	17790	17467	17470
8.52	17171	17795	17472	17475
8.53	17176	17801	17476	17480
8.54	17181	17806	17482	17485
8.55	17184	17811	17487	17490
8.56	17189	17815	17493	17496
8.57	17193	17820	17498	17501
8.58	17199	17824	17503	17506
8.59	17204	17829	17508	17511
8.6	17208	17836	17513	17516
8.61	17214	17841	17518	17521
8.62	17219	17844	17523	17526
8.63	17224	17851	17528	17531
8.64	17228	17858	17533	17536
8.65	17232	17864	17537	17541
8.66	17239	17868	17543	17546
8.67	17243	17873	17548	17551
8.68	17247	17879	17553	17556
8.69	17251	17885	17558	17561
8.7	17255	17890	17562	17566
8.71	17260	17897	17568	17571
8.72	17265	17902	17573	17576
8.73	17270	17907	17578	17581
8.74	17274	17912	17582	17586
8.75	17278	17918	17587	17591
8.76	17285	17922	17593	17596
8.77	17291	17927	17598	17602
8.78	17296	17934	17603	17607
8.79	17299	17940	17609	17612
8.8	17306	17946	17614	17617
8.81	17310	17952	17619	17622
8.82	17315	17958	17624	17627
8.83	17321	17963	17629	17632
8.84	17325	17969	17634	17637
8.85	17329	17973	17639	17642
8.86	17335	17977	17644	17647
8.87	17341	17983	17649	17652
8.88	17346	17990	17654	17657
8.89	17349	17995	17659	17662
8.9	17352	18000	17664	17667
8.91	17359	18004	17670	17673
8.92	17364	18008	17674	17678
8.93	17369	18013	17679	17683
8.94	17373	18017	17685	17688
8.95	17378	18022	17689	17693
8.96	17382	18027	17695	17698
8.97	17386	18033	17699	17703
8.98	17391	18039	17704	17708
8.99	17396	18047	17709	17713
9	17402	18053	17713	17718
9.01	17407	18058	17718	17723
9.02	17412	18063	17723	17728
9.03	17416	18069	17728	17733
9.04	17421	18075	17733	17738
9.05	17426	18084	17738	17743
9.06	17430	18087	17743	17748
9.07	17436	18092	17748	17753
9.08	17441	18098	17753	17758
9.09	17445	18103	17758	17763
9.1	17452	18108	17764	17768
9.11	17458	18113	17769	17773
9.12	17463	18118	17774	17778
9.13	17468	18124	17778	17783
9.14	17474	18129	17783	17788
9.15	17478	18133	17788	17793
9.16	17482	18140	17793	17798
9.17	17489	18143	17798	17803
9.18	17494	18150	17803	17808
9.19	17498	18155	17808	17813
9.2	17502	18161	17813	17818
9.21	17508	18167	17818	17823
9.22	17511	18174	17824	17828
9.23	17517	18179	17829	17833
9.24	17521	18185	17834	17838
9.25	17527	18191	17838	17843
9.26	17530	18196	17843	17848
9.27	17536	18198	17849	17854
9.28	17541	18204	17854	17859
9.29	17544	18208	17859	17864
9.3	17548	18213	17864	17869
9.31	17554	18219	17869	17874
9.32	17559	18224	17873	17879
9.33	17564	18231	17878	17883
9.34	17569	18234	17883	17888
9.35	17573	18239	17889	17893
9.36	17578	18246	17893	17898
9.37	17584	18251	17898	17903
9.38	17588	18257	17903	17908
9.39	17591	18263	17909	17913
9.4	17597	18269	17914	17918
9.41	17601	18273	17918	17923
9.42	17607	18278	17924	17929
9.43	17612	18283	17929	17934
9.44	17616	18289	17934	17939
9.45	17619	18294	17939	17944
9.46	17625	18300	17944	17949
9.47	17632	18305	17949	17954
9.48	17638	18311	17954	17959
9.49	17642	18316	17959	17964
9.5	17647	18322	17964	17969
9.51	17652	18326	17969	17974
9.52	17657	18331	17973	17979
9.53	17662	18339	17978	17984
9.54	17666	18343	17983	17989
9.55	17669	18350	17988	17994
9.56	17674	18354	17993	17999
9.57	17680	18359	17999	18004
9.58	17684	18364	18005	18009
9.59	17690	18370	18010	18014
9.6	17696	18376	18015	18020
9.61	17702	18382	18019	18025
9.62	17706	18386	18025	18030
9.63	17712	18390	18030	18035
9.64	17716	18397	18035	18040
9.65	17722	18401	18040	18045
9.66	17727	18406	18045	18050
9.67	17732	18411	18050	18055
9.68	17736	18418	18055	18060
9.69	17742	18425	18060	18065
9.7	17745	18429	18065	18071
9.71	17751	18436	18070	18076
9.72	17755	18440	18075	18081
9.73	17760	18445	18081	18086
9.74	17764	18453	18086	18091
9.75	17770	18459	18091	18096
9.76	17776	18463	18097	18101
9.77	17782	18467	18101	18106
9.78	17788	18473	18107	18111
9.79	17794	18479	18112	18116
9.8	17799	18482	18117	18121
9.81	17804	18489	18122	18126
9.82	17809	18493	18127	18131
9.83	17814	18497	18131	18136
9.84	17819	18503	18137	18141
9.85	17822	18510	18142	18146
9.86	17826	18516	18147	18151
9.87	17832	18521	18153	18156
9.88	17836	18525	18158	18161
9.89	17841	18530	18163	18166
9.9	17845	18533	18168	18171
9.91	17852	18538	18173	18176
9.92	17857	18544	18177	18181
9.93	17863	18550	18182	18186
9.94	17867	18556	18188	18191
9.95	17871	18560	18193	18196
9.96	17876	18567	18197	18201
9.97	17880	18572	18202	18206
9.98	17885	18578	18208	18211
9.99	17890	18584	18212	18216
10	17896	18589	18217	18221
10.01	17900	18594	18223	18226
10.02	17907	18599	18228	18232
10.03	17912	18604	18233	18237
10.04	17915	18610	18238	18242
10.05	17919	18618	18244	18247
10.06	17925	18623	18249	18252
10.07	17927	18628	18253	18257
10.08	17932	18634	18258	18262
10.09	17937	18641	18263	18267
10.1	17941	18647	18267	18272
10.11	17947	18652	18272	18277
10.12	17951	18656	18276	18282
10.13	17956	18660	18281	18287
10.14	17960	18664	18287	18292
10.15	17964	18670	18292	18297
10.16	17969	18674	18297	18302
10.17	17975	18678	18302	18307
10.18	17980	18684	18307	18312
10.19	17982	18688	18313	18317
10.2	17987	18693	18317	18322
10.21	17992	18697	18322	18326
10.22	17998	18700	18328	18331
10.23	18003	18704	18332	18336
10.24	18007	18708	18337	18341
10.25	18011	18715	18341	18346
10.26	18019	18720	18347	18351
10.27	18024	18724	18352	18356
10.28	18028	18731	18357	18361
10.29	18033	18737	18362	18366
10.3	18040	18746	18366	18371
10.31	18044	18751	18371	18376
10.32	18051	18755	18377	18381
10.33	18056	18760	18381	18386
10.34	18059	18765	18386	18392
10.35	18064	18771	18391	18397
10.36	18070	18776	18396	18402
10.37	18074	18783	18402	18407
10.38	18080	18786	18406	18412
10.39	18085	18793	18411	18417
10.4	18089	18797	18416	18422
10.41	18094	18802	18421	18427
10.42	18098	18807	18427	18432
10.43	18103	18814	18431	18437
10.44	18108	18817	18437	18442
10.45	18114	18823	18442	18447
10.46	18117	18830	18447	18452
10.47	18124	18834	18452	18457
10.48	18128	18839	18457	18462
10.49	18133	18845	18462	18467
10.5	18137	18850	18467	18472
10.51	18143	18853	18472	18477
10.52	18148	18857	18477	18482
10.53	18152	18865	18482	18487
10.54	18157	18870	18487	18492
10.55	18161	18876	18491	18498
10.56	18166	18880	18497	18503
10.57	18172	18884	18501	18508
10.58	18175	18889	18506	18513
10.59	18179	18894	18512	18518
10.6	18184	18897	18517	18523
10.61	18189	18903	18521	18528
10.62	18193	18907	18527	18533
10.63	18199	18911	18531	18538
10.64	18204	18917	18536	18543
10.65	18207	18923	18542	18548
10.66	18214	18929	18547	18553
10.67	18220	18934	18552	18558
10.68	18226	18941	18558	18563
10.69	18231	18948	18563	18568
10.7	18236	18956	18568	18573
10.71	18243	18960	18573	18578
10.72	18249	18965	18578	18583
10.73	18255	18971	18583	18588
10.74	18261	18977	18588	18593
10.75	18265	18983	18592	18598
10.76	18272	18989	18598	18604
10.77	18277	18996	18603	18609
10.78	18283	19002	18608	18614
10.79	18288	19010	18613	18619
10.8	18294	19017	18618	18624
10.81	18299	19021	18623	18629
10.82	18303	19024	18628	18634
10.83	18307	19031	18633	18639
10.84	18311	19036	18639	18644
10.85	18314	19040	18644	18649
10.86	18321	19046	18649	18654
10.87	18325	19051	18654	18659
10.88	18330	19056	18659	18664
10.89	18335	19061	18663	18669
10.9	18340	19067	18668	18674
10.91	18344	19073	18674	18679
10.92	18347	19079	18679	18684
10.93	18351	19083	18684	18689
10.94	18357	19088	18689	18694
10.95	18362	19094	18693	18699
10.96	18368	19100	18698	18704
10.97	18374	19105	18703	18709
10.98	18378	19110	18708	18714
10.99	18382	19115	18714	18719
11	18385	19121	18719	18724
11.01	18390	19126	18723	18729
11.02	18396	19132	18728	18734
11.03	18401	19139	18732	18739
11.04	18405	19144	18737	18744
11.05	18411	19150	18742	18749
11.06	18417	19154	18748	18754
11.07	18423	19158	18753	18759
11.08	18428	19164	18758	18764
11.09	18434	19170	18763	18770
11.1	18439	19175	18769	18775
11.11	18444	19180	18774	18780
11.12	18449	19184	18779	18785
11.13	18453	19190	18784	18790
11.14	18457	19196	18789	18795
11.15	18460	19204	18794	18800
11.16	18465	19209	18799	18805
11.17	18471	19213	18804	18810
11.18	18476	19217	18810	18815
11.19	18480	19223	18815	18821
11.2	18485	19227	18820	18826
11.21	18491	19234	18826	18831
11.22	18494	19241	18830	18836
11.23	18500	19247	18835	18841
11.24	18506	19254	18840	18846
11.25	18511	19260	18846	18851
11.26	18517	19265	18850	18856
11.27	18523	19270	18855	18861
11.28	18528	19274	18859	18866
11.29	18530	19278	18864	18871
11.3	18534	19283	18869	18876
11.31	18541	19289	18874	18881
11.32	18547	19293	18879	18886
11.33	18553	19298	18884	18891
11.34	18558	19301	18889	18896
11.35	18562	19307	18894	18901
11.36	18566	19315	18899	18906
11.37	18570	19320	18905	18911
11.38	18575	19327	18909	18916
11.39	18580	19333	18915	18921
11.4	18585	19337	18920	18925
11.41	18591	19342	18925	18930
11.42	18595	19350	18930	18935
11.43	18599	19355	18935	18940
11.44	18605	19361	18939	18945
11.45	18611	19366	18944	18950
11.46	18616	19371	18949	18955
11.47	18621	19375	18954	18960
11.48	18626	19380	18959	18965
11.49	18630	19384	18964	18970
11.5	18635	19391	18969	18975
11.51	18641	19399	18974	18980
11.52	18648	19404	18979	18985
11.53	18654	19410	18985	18990
11.54	18657	19416	18989	18995
11.55	18662	19422	18994	19000
11.56	18666	19426	19000	19005
11.57	18671	19432	19005	19011
11.58	18675	19438	19010	19016
11.59	18679	19444	19015	19021
11.6	18684	19448	19020	19026
11.61	18691	19454	19025	19031
11.62	18696	19462	19029	19036
11.63	18703	19470	19034	19041
11.64	18706	19476	19040	19046
11.65	18709	19479	19045	19051
11.66	18715	19486	19050	19056
11.67	18722	19492	19055	19061
11.68	18730	19497	19060	19066
11.69	18733	19501	19065	19071
11.7	18738	19505	19070	19076
11.71	18743	19510	19076	19082
11.72	18750	19517	19081	19087
11.73	18755	19523	19088	19092
11.74	18758	19532	19093	19097
11.75	18762	19539	19098	19102
11.76	18767	19544	19102	19106
11.77	18772	19547	19107	19111
11.78	18777	19550	19111	19115
11.79	18780	19555	19115	19120
11.8	18783	19560	19119	19124
11.81	18789	19563	19123	19129
11.82	18794	19566	19127	19133
11.83	18799	19568	19132	19137
11.84	18803	19573	19136	19142
11.85	18808	19578	19140	19146
11.86	18812	19582	19144	19150
11.87	18816	19589	19150	19155
11.88	18823	19595	19153	19159
11.89	18827	19598	19158	19163
11.9	18831	19603	19162	19168
11.91	18835	19606	19166	19172
11.92	18839	19609	19171	19176
11.93	18844	19614	19175	19181
11.94	18850	19617	19179	19185
11.95	18854	19620	19183	19189
11.96	18858	19624	19187	19194
11.97	18861	19628	19191	19198
11.98	18864	19632	19196	19202
11.99	18868	19637	19199	19207
12	18874	19641	19204	19211
12.01	18876	19645	19208	19215
12.02	18879	19649	19211	19219
12.03	18886	19652	19215	19224
12.04	18889	19656	19219	19228
12.05	18894	19660	19223	19232
12.06	18898	19663	19227	19236
12.07	18902	19667	19231	19240
12.08	18906	19672	19235	19245
12.09	18908	19676	19239	19249
12.1	18911	19679	19244	19253
12.11	18916	19684	19248	19257
12.12	18923	19689	19252	19261
12.13	18928	19694	19257	19266
12.14	18933	19697	19261	19270
12.15	18936	19703	19266	19274
12.16	18941	19706	19270	19279
12.17	18946	19712	19274	19283
12.18	18950	19716	19278	19287
12.19	18955	19720	19282	19291
12.2	18959	19723	19288	19296
12.21	18962	19727	19291	19300
12.22	18967	19731	19296	19304
12.23	18971	19736	19300	19309
12.24	18975	19741	19304	19313
12.25	18978	19747	19308	19317
12.26	18984	19751	19312	19321
12.27	18988	19756	19316	19326
12.28	18993	19760	19320	19330
12.29	18996	19763	19325	19334
12.3	19000	19766	19329	19339
12.31	19005	19770	19333	19343
12.32	19009	19775	19337	19347
12.33	19012	19777	19342	19352
12.34	19016	19780	19346	19356
12.35	19019	19783	19351	19360
12.36	19024	19788	19355	19365
12.37	19029	19792	19360	19369
12.38	19034	19796	19364	19373
12.39	19040	19802	19368	19378
12.4	19043	19805	19373	19382
12.41	19048	19811	19377	19386
12.42	19053	19814	19381	19391
12.43	19058	19819	19385	19395
12.44	19062	19822	19389	19399
12.45	19065	19826	19393	19404
12.46	19072	19829	19397	19408
12.47	19076	19832	19401	19412
12.48	19081	19837	19405	19416
12.49	19084	19841	19410	19421
12.5	19088	19845	19414	19425
12.51	19093	19849	19419	19429
12.52	19097	19853	19423	19434
12.53	19101	19856	19427	19438
12.54	19104	19859	19431	19442
12.55	19106	19863	19436	19446
12.56	19110	19867	19440	19451
12.57	19114	19871	19445	19455
12.58	19117	19874	19449	19459
12.59	19121	19878	19453	19464
12.6	19125	19884	19457	19468
12.61	19128	19888	19462	19472
12.62	19135	19893	19466	19477
12.63	19140	19897	19470	19481
12.64	19146	19900	19475	19485
12.65	19151	19904	19479	19489
12.66	19155	19906	19484	19494
12.67	19159	19910	19488	19498
12.68	19162	19915	19493	19502
12.69	19167	19919	19497	19507
12.7	19172	19923	19501	19511
12.71	19177	19927	19505	19515
12.72	19182	19931	19509	19520
12.73	19187	19935	19513	19524
12.74	19193	19940	19518	19528
12.75	19198	19946	19522	19533
12.76	19201	19949	19527	19537
12.77	19205	19952	19531	19541
12.78	19208	19956	19535	19546
12.79	19211	19962	19540	19550
12.8	19214	19965	19544	19554
12.81	19219	19968	19548	19559
12.82	19223	19971	19553	19563
12.83	19228	19975	19556	19567
12.84	19232	19979	19561	19572
12.85	19236	19984	19564	19576
12.86	19239	19986	19569	19580
12.87	19244	19991	19572	19584
12.88	19248	19996	19576	19589
12.89	19251	20001	19581	19593
12.9	19254	20006	19585	19597
12.91	19259	20011	19589	19601
12.92	19264	20015	19593	19606
12.93	19267	20018	19598	19610
12.94	19271	20021	19603	19614
12.95	19275	20025	19606	19619
12.96	19280	20029	19611	19623
12.97	19284	20032	19616	19627
12.98	19288	20037	19620	19632
12.99	19292	20041	19625	19636
13	19297	20044	19630	19641
13.01	19302	20050	19635	19645
13.02	19305	20056	19638	19649
13.03	19310	20060	19642	19653
13.04	19315	20064	19647	19658
13.05	19319	20070	19651	19662
13.06	19324	20075	19655	19666
13.07	19330	20080	19659	19670
13.08	19335	20083	19664	19675
13.09	19340	20087	19668	19679
13.1	19344	20089	19672	19683
13.11	19349	20095	19677	19688
13.12	19354	20098	19681	19692
13.13	19361	20102	19685	19696
13.14	19365	20107	19690	19701
13.15	19370	20112	19694	19705
13.16	19375	20116	19698	19709
13.17	19380	20120	19702	19713
13.18	19385	20125	19705	19717
13.19	19390	20129	19709	19722
13.2	19395	20132	19713	19726
13.21	19399	20138	19717	19730
13.22	19403	20142	19721	19734
13.23	19408	20145	19725	19739
13.24	19413	20150	19730	19743
13.25	19415	20154	19734	19747
13.26	19420	20158	19738	19751
13.27	19422	20163	19742	19756
13.28	19425	20167	19747	19760
13.29	19431	20170	19751	19764
13.3	19436	20175	19756	19769
13.31	19439	20178	19760	19773
13.32	19447	20182	19765	19777
13.33	19451	20186	19768	19782
13.34	19455	20191	19773	19786
13.35	19459	20196	19777	19790
13.36	19463	20200	19781	19794
13.37	19467	20204	19786	19799
13.38	19470	20207	19791	19803
13.39	19475	20211	19794	19807
13.4	19478	20216	19798	19811
13.41	19482	20221	19803	19815
13.42	19486	20225	19807	19819
13.43	19493	20229	19811	19824
13.44	19499	20232	19815	19828
13.45	19505	20237	19819	19832
13.46	19510	20240	19823	19836
13.47	19513	20245	19827	19840
13.48	19517	20250	19832	19844
13.49	19521	20253	19836	19849
13.5	19525	20257	19840	19853
13.51	19530	20261	19843	19857
13.52	19533	20264	19847	19861
13.53	19537	20267	19852	19865
13.54	19540	20271	19856	19869
13.55	19542	20275	19860	19873
13.56	19547	20278	19864	19878
13.57	19550	20281	19868	19882
13.58	19554	20286	19873	19886
13.59	19558	20290	19876	19890
13.6	19562	20295	19881	19894
13.61	19568	20299	19885	19898
13.62	19572	20304	19889	19902
13.63	19574	20308	19893	19907
13.64	19579	20312	19897	19911
13.65	19583	20317	19902	19915
13.66	19588	20320	19905	19919
13.67	19593	20324	19910	19923
13.68	19595	20328	19915	19927
13.69	19599	20332	19919	19932
13.7	19605	20336	19923	19936
13.71	19610	20341	19927	19940
13.72	19615	20344	19932	19944
13.73	19618	20347	19935	19948
13.74	19623	20352	19940	19952
13.75	19627	20357	19945	19957
13.76	19632	20359	19949	19961
13.77	19636	20363	19953	19965
13.78	19640	20370	19957	19969
13.79	19644	20375	19961	19973
13.8	19648	20380	19967	19977
13.81	19652	20384	19970	19981
13.82	19657	20389	19974	19986
13.83	19662	20392	19979	19990
13.84	19665	20394	19983	19994
13.85	19671	20398	19987	19998
13.86	19675	20401	19991	20002
13.87	19677	20406	19996	20007
13.88	19681	20409	20000	20011
13.89	19685	20415	20004	20015
13.9	19690	20419	20008	20019
13.91	19695	20422	20013	20023
13.92	19698	20425	20017	20027
13.93	19703	20428	20021	20032
13.94	19708	20431	20025	20036
13.95	19712	20435	20030	20040
13.96	19716	20439	20034	20044
13.97	19719	20443	20038	20049
13.98	19722	20448	20042	20053
13.99	19726	20454	20046	20057
14	19731	20461	20050	20061
14.01	19736	20463	20055	20066
14.02	19742	20467	20059	20070
14.03	19746	20470	20063	20074
14.04	19751	20472	20067	20078
14.05	19753	20477	20072	20082
14.06	19758	20480	20075	20087
14.07	19761	20484	20079	20091
14.08	19765	20489	20084	20095
14.09	19771	20494	20088	20099
14.1	19775	20498	20092	20103
14.11	19780	20503	20096	20108
14.12	19786	20507	20102	20112
14.13	19791	20511	20106	20116
14.14	19796	20516	20110	20120
14.15	19799	20521	20115	20124
14.16	19804	20526	20119	20128
14.17	19808	20528	20122	20132
14.18	19812	20532	20126	20137
14.19	19816	20537	20130	20141
14.2	19822	20542	20135	20145
14.21	19825	20546	20139	20149
14.22	19829	20550	20143	20153
14.23	19832	20553	20147	20157
14.24	19834	20556	20151	20162
14.25	19839	20563	20156	20166
14.26	19844	20567	20160	20170
14.27	19849	20571	20164	20174
14.28	19853	20574	20169	20178
14.29	19855	20576	20173	20183
14.3	19859	20580	20177	20187
14.31	19863	20583	20182	20191
14.32	19867	20587	20186	20195
14.33	19872	20592	20190	20199
14.34	19876	20597	20194	20203
14.35	19880	20604	20199	20208
14.36	19885	20606	20203	20212
14.37	19889	20610	20207	20216
14.38	19894	20614	20211	20220
14.39	19899	20617	20216	20224
14.4	19904	20621	20219	20228
14.41	19907	20625	20223	20232
14.42	19910	20628	20227	20236
14.43	19913	20633	20231	20240
14.44	19918	20638	20235	20244
14.45	19923	20643	20239	20248
14.46	19928	20646	20243	20253
14.47	19932	20650	20248	20257
14.48	19936	20654	20252	20261
14.49	19939	20657	20256	20265
14.5	19942	20661	20260	20269
14.51	19949	20665	20264	20273
14.52	19952	20669	20268	20277
14.53	19956	20673	20273	20281
14.54	19961	20676	20276	20285
14.55	19966	20679	20281	20290
14.56	19971	20683	20285	20294
14.57	19976	20688	20288	20298
14.58	19980	20692	20292	20302
14.59	19983	20695	20297	20306
14.6	19988	20699	20301	20310
14.61	19992	20702	20305	20314
14.62	19996	20706	20310	20318
14.63	20000	20710	20314	20323
14.64	20005	20715	20319	20327
14.65	20008	20719	20323	20331
14.66	20014	20722	20327	20335
14.67	20019	20729	20332	20339
14.68	20022	20733	20335	20343
14.69	20025	20738	20339	20348
14.7	20029	20742	20344	20352
14.71	20033	20747	20349	20356
14.72	20038	20750	20353	20360
14.73	20044	20755	20357	20364
14.74	20049	20759	20362	20368
14.75	20053	20763	20365	20372
14.76	20056	20766	20370	20376
14.77	20060	20771	20374	20380
14.78	20064	20776	20377	20384
14.79	20068	20779	20381	20389
14.8	20072	20783	20385	20393
14.81	20076	20786	20389	20397
14.82	20079	20791	20393	20401
14.83	20084	20794	20398	20405
14.84	20087	20797	20402	20409
14.85	20091	20801	20406	20413
14.86	20096	20804	20410	20417
14.87	20101	20808	20414	20421
14.88	20106	20812	20418	20425
14.89	20110	20817	20422	20429
14.9	20113	20820	20426	20433
14.91	20117	20825	20430	20438
14.92	20123	20831	20434	20442
14.93	20127	20837	20439	20446
14.94	20134	20841	20443	20450
14.95	20137	20846	20447	20454
14.96	20140	20849	20451	20458
14.97	20145	20852	20454	20463
14.98	20150	20856	20458	20467
14.99	20155	20860	20462	20471
15	20158	20864	20466	20475
15.01	20162	20868	20471	20479
15.02	20168	20873	20475	20483
15.03	20171	20877	20479	20488
15.04	20176	20881	20484	20492
15.05	20180	20885	20488	20496
15.06	20185	20889	20492	20500
15.07	20189	20893	20496	20504
15.08	20193	20896	20501	20508
15.09	20199	20900	20504	20513
15.1	20201	20904	20509	20517
15.11	20206	20907	20512	20521
15.12	20210	20913	20517	20525
15.13	20214	20920	20521	20529
15.14	20219	20924	20526	20533
15.15	20224	20927	20530	20538
15.16	20227	20931	20534	20542
15.17	20231	20935	20538	20545
15.18	20235	20938	20542	20549
15.19	20239	20941	20546	20553
15.2	20243	20945	20550	20557
15.21	20248	20948	20554	20561
15.22	20252	20951	20558	20565
15.23	20257	20954	20562	20569
15.24	20263	20957	20566	20573
15.25	20267	20960	20571	20577
15.26	20271	20964	20574	20581
15.27	20275	20967	20579	20585
15.28	20278	20970	20582	20589
15.29	20281	20973	20586	20593
15.3	20283	20976	20590	20597
15.31	20289	20980	20594	20601
15.32	20293	20985	20598	20605
15.33	20296	20989	20601	20609
15.34	20299	20993	20604	20613
15.35	20302	20997	20608	20617
15.36	20307	21001	20613	20621
15.37	20312	21004	20616	20625
15.38	20317	21009	20620	20629
15.39	20322	21013	20624	20633
15.4	20326	21019	20628	20637
15.41	20329	21022	20632	20641
15.42	20332	21024	20636	20645
15.43	20335	21029	20640	20649
15.44	20339	21033	20644	20653
15.45	20343	21036	20648	20657
15.46	20349	21041	20651	20661
15.47	20354	21043	20656	20665
15.48	20357	21046	20659	20669
15.49	20361	21051	20663	20673
15.5	20363	21054	20667	20677
15.51	20368	21057	20671	20681
15.52	20374	21061	20674	20685
15.53	20378	21065	20679	20689
15.54	20382	21069	20682	20693
15.55	20386	21073	20686	20697
15.56	20390	21076	20691	20701
15.57	20394	21080	20695	20705
15.58	20398	21083	20699	20709
15.59	20402	21086	20703	20713
15.6	20405	21089	20707	20717
15.61	20411	21093	20711	20721
15.62	20416	21098	20716	20725
15.63	20420	21104	20719	20729
15.64	20424	21107	20723	20733
15.65	20429	21113	20727	20737
15.66	20433	21115	20731	20741
15.67	20437	21118	20735	20745
15.68	20440	21122	20739	20750
15.69	20445	21125	20743	20754
15.7	20449	21129	20747	20758
15.71	20452	21133	20751	20762
15.72	20457	21138	20755	20766
15.73	20460	21141	20759	20770
15.74	20465	21146	20763	20774
15.75	20468	21151	20767	20778
15.76	20472	21154	20771	20782
15.77	20476	21158	20775	20786
15.78	20481	21161	20778	20790
15.79	20484	21165	20783	20794
15.8	20488	21167	20787	20798
15.81	20493	21171	20791	20802
15.82	20498	21173	20795	20806
15.83	20504	21178	20799	20810
15.84	20507	21182	20803	20814
15.85	20511	21186	20808	20818
15.86	20515	21189	20811	20822
15.87	20518	21193	20815	20827
15.88	20523	21195	20820	20831
15.89	20526	21199	20824	20835
15.9	20533	21203	20828	20839
15.91	20536	21207	20831	20843
15.92	20540	21211	20835	20847
15.93	20544	21213	20839	20851
15.94	20548	21217	20844	20855
15.95	20552	21221	20848	20859
15.96	20556	21226	20852	20863
15.97	20563	21230	20856	20867
15.98	20565	21235	20860	20871
15.99	20569	21240	20864	20875
16	20574	21244	20868	20879
16.01	20577	21249	20872	20883
16.02	20581	21252	20876	20887
16.03	20585	21256	20879	20891
16.04	20589	21262	20883	20895
16.05	20592	21265	20887	20899
16.06	20596	21269	20891	20903
16.07	20601	21272	20894	20907
16.08	20605	21275	20898	20911
16.09	20610	21279	20901	20914
16.1	20612	21283	20905	20918
16.11	20616	21288	20909	20922
16.12	20621	21292	20913	20926
16.13	20625	21296	20916	20930
16.14	20630	21300	20920	20934
16.15	20633	21304	20925	20938
16.16	20636	21308	20929	20942
16.17	20641	21310	20933	20946
16.18	20645	21314	20937	20950
16.19	20650	21318	20941	20954
16.2	20652	21321	20945	20958
16.21	20658	21326	20949	20962
16.22	20662	21329	20953	20966
16.23	20667	21333	20957	20970
16.24	20672	21337	20961	20974
16.25	20676	21341	20965	20978
16.26	20682	21344	20968	20982
16.27	20689	21347	20972	20986
16.28	20692	21352	20976	20990
16.29	20696	21355	20980	20994
16.3	20700	21360	20984	20998
16.31	20705	21364	20988	21002
16.32	20710	21368	20992	21006
16.33	20714	21373	20996	21010
16.34	20718	21377	21000	21014
16.35	20722	21381	21004	21018
16.36	20725	21384	21008	21022
16.37	20730	21388	21012	21026
16.38	20734	21391	21016	21030
16.39	20739	21395	21019	21034
16.4	20743	21398	21023	21038
16.41	20746	21402	21027	21042
16.42	20750	21405	21031	21046
16.43	20754	21410	21034	21050
16.44	20760	21413	21038	21054
16.45	20763	21416	21042	21058
16.46	20768	21421	21046	21062
16.47	20774	21425	21049	21066
16.48	20776	21428	21054	21070
16.49	20781	21432	21058	21074
16.5	20784	21435	21062	21078
16.51	20788	21439	21065	21082
16.52	20793	21443	21070	21086
16.53	20796	21447	21074	21090
16.54	20800	21452	21077	21094
16.55	20806	21457	21082	21098
16.56	20811	21460	21085	21102
16.57	20813	21464	21089	21106
16.58	20819	21468	21093	21110
16.59	20822	21471	21097	21114
16.6	20826	21475	21101	21118
16.61	20832	21476	21104	21122
16.62	20835	21479	21108	21125
16.63	20839	21484	21112	21129
16.64	20843	21488	21117	21133
16.65	20846	21490	21120	21137
16.66	20851	21493	21124	21141
16.67	20855	21497	21127	21144
16.68	20858	21501	21131	21148
16.69	20861	21504	21135	21152
16.7	20864	21507	21139	21156
16.71	20870	21512	21143	21160
16.72	20874	21515	21147	21163
16.73	20878	21518	21151	21167
16.74	20881	21521	21155	21171
16.75	20884	21523	21158	21175
16.76	20888	21528	21161	21178
16.77	20892	21532	21165	21182
16.78	20896	21535	21169	21186
16.79	20899	21538	21173	21190
16.8	20901	21540	21177	21194
16.81	20906	21543	21180	21198
16.82	20910	21547	21184	21201
16.83	20913	21550	21188	21205
16.84	20916	21553	21191	21209
16.85	20919	21556	21195	21213
16.86	20924	21559	21200	21216
16.87	20927	21562	21203	21220
16.88	20930	21565	21207	21224
16.89	20934	21568	21211	21228
16.9	20938	21572	21215	21231
16.91	20942	21576	21219	21235
16.92	20945	21579	21223	21239
16.93	20949	21583	21226	21243
16.94	20953	21587	21230	21246
16.95	20958	21591	21234	21250
16.96	20962	21593	21238	21254
16.97	20966	21596	21241	21258
16.98	20970	21600	21245	21261
16.99	20973	21603	21248	21265
17	20978	21608	21253	21269
17.01	20982	21612	21256	21273
17.02	20984	21615	21260	21276
17.03	20987	21618	21264	21280
17.04	20990	21623	21268	21284
17.05	20994	21627	21272	21288
17.06	20999	21631	21276	21291
17.07	21003	21633	21280	21295
17.08	21007	21636	21284	21299
17.09	21012	21639	21288	21303
17.1	21017	21642	21292	21307
17.11	21020	21646	21295	21310
17.12	21025	21650	21298	21314
17.13	21029	21653	21302	21318
17.14	21033	21657	21305	21321
17.15	21036	21661	21309	21325
17.16	21041	21664	21313	21329
17.17	21045	21667	21318	21332
17.18	21048	21670	21322	21336
17.19	21052	21673	21326	21340
17.2	21056	21676	21330	21344
17.21	21059	21680	21333	21347
17.22	21063	21682	21336	21351
17.23	21067	21685	21340	21355
17.24	21069	21690	21344	21359
17.25	21072	21693	21348	21362
17.26	21077	21698	21352	21366
17.27	21080	21701	21356	21370
17.28	21083	21703	21359	21374
17.29	21089	21707	21363	21377
17.3	21093	21711	21367	21381
17.31	21097	21714	21371	21385
17.32	21100	21717	21374	21389
17.33	21103	21721	21378	21393
17.34	21107	21726	21381	21396
17.35	21110	21729	21385	21400
17.36	21114	21732	21389	21404
17.37	21117	21737	21393	21408
17.38	21122	21739	21397	21412
17.39	21126	21744	21401	21415
17.4	21130	21746	21405	21419
17.41	21134	21751	21409	21423
17.42	21138	21755	21413	21427
17.43	21140	21758	21416	21430
17.44	21141	21760	21420	21434
17.45	21145	21762	21423	21438
17.46	21150	21766	21427	21442
17.47	21155	21770	21431	21445
17.48	21158	21772	21434	21449
17.49	21163	21775	21438	21453
17.5	21167	21779	21442	21456
17.51	21171	21782	21446	21460
17.52	21175	21785	21449	21464
17.53	21178	21789	21453	21468
17.54	21182	21792	21457	21472
17.55	21186	21796	21461	21475
17.56	21190	21800	21465	21479
17.57	21195	21804	21469	21483
17.58	21200	21809	21472	21487
17.59	21204	21813	21476	21490
17.6	21208	21818	21480	21494
17.61	21210	21820	21484	21498
17.62	21212	21824	21488	21502
17.63	21218	21828	21492	21506
17.64	21221	21834	21495	21510
17.65	21225	21839	21499	21513
17.66	21229	21842	21504	21517
17.67	21232	21844	21508	21521
17.68	21238	21847	21511	21525
17.69	21240	21851	21516	21529
17.7	21244	21855	21519	21533
17.71	21248	21858	21523	21537
17.72	21252	21861	21527	21540
17.73	21256	21863	21532	21544
17.74	21259	21868	21536	21548
17.75	21264	21871	21540	21552
17.76	21267	21875	21543	21556
17.77	21271	21878	21547	21560
17.78	21276	21883	21552	21563
17.79	21278	21888	21555	21567
17.8	21282	21893	21559	21571
17.81	21287	21898	21564	21575
17.82	21292	21900	21568	21579
17.83	21295	21903	21573	21583
17.84	21299	21907	21577	21587
17.85	21303	21909	21582	21590
17.86	21306	21912	21585	21594
17.87	21309	21915	21590	21598
17.88	21316	21919	21593	21602
17.89	21320	21923	21597	21606
17.9	21325	21927	21601	21610
17.91	21329	21930	21605	21614
17.92	21331	21934	21609	21618
17.93	21334	21938	21613	21622
17.94	21337	21942	21617	21625
17.95	21340	21948	21621	21629
17.96	21344	21951	21624	21633
17.97	21347	21955	21627	21637
17.98	21352	21958	21631	21641
17.99	21355	21962	21636	21645
18	21359	21965	21641	21649
18.01	21363	21969	21644	21652
18.02	21367	21973	21648	21656
18.03	21371	21977	21652	21660
18.04	21375	21981	21656	21664
18.05	21378	21984	21660	21668
18.06	21381	21987	21663	21672
18.07	21384	21990	21668	21676
18.08	21386	21994	21672	21679
18.09	21389	21998	21676	21683
18.1	21394	22002	21681	21687
18.11	21399	22004	21685	21691
18.12	21403	22008	21688	21695
18.13	21408	22012	21692	21699
18.14	21411	22015	21697	21703
18.15	21415	22019	21700	21707
18.16	21419	22024	21704	21710
18.17	21423	22028	21708	21714
18.18	21428	22031	21712	21718
18.19	21432	22035	21717	21722
18.2	21436	22039	21721	21726
18.21	21438	22042	21724	21730
18.22	21441	22045	21728	21734
18.23	21445	22049	21732	21737
18.24	21448	22053	21736	21741
18.25	21452	22059	21740	21745
18.26	21457	22063	21743	21749
18.27	21462	22066	21748	21753
18.28	21466	22069	21752	21757
18.29	21470	22073	21756	21760
18.3	21475	22077	21760	21764
18.31	21478	22080	21764	21768
18.32	21481	22083	21768	21772
18.33	21486	22086	21772	21776
18.34	21488	22089	21776	21780
18.35	21492	22092	21780	21783
18.36	21496	22096	21784	21787
18.37	21501	22100	21788	21791
18.38	21504	22103	21791	21795
18.39	21508	22108	21795	21799
18.4	21512	22111	21799	21802
18.41	21516	22114	21803	21806
18.42	21519	22118	21807	21810
18.43	21523	22122	21811	21814
18.44	21526	22126	21815	21818
18.45	21530	22130	21819	21821
18.46	21534	22133	21822	21825
18.47	21538	22138	21827	21829
18.48	21543	22140	21831	21833
18.49	21547	22145	21835	21837
18.5	21551	22150	21839	21841
18.51	21556	22153	21843	21845
18.52	21559	22156	21848	21849
18.53	21562	22160	21852	21852
18.54	21565	22164	21855	21856
18.55	21568	22169	21859	21860
18.56	21572	22172	21863	21864
18.57	21577	22175	21867	21868
18.58	21580	22179	21871	21872
18.59	21583	22183	21876	21876
18.6	21587	22186	21880	21880
18.61	21591	22190	21884	21884
18.62	21594	22195	21888	21888
18.63	21598	22199	21892	21891
18.64	21602	22202	21896	21895
18.65	21606	22205	21900	21899
18.66	21611	22210	21904	21903
18.67	21615	22214	21907	21907
18.68	21620	22220	21911	21911
18.69	21624	22225	21915	21915
18.7	21628	22228	21919	21919
18.71	21631	22232	21923	21922
18.72	21635	22235	21926	21926
18.73	21639	22237	21930	21930
18.74	21642	22242	21934	21934
18.75	21646	22246	21938	21938
18.76	21650	22249	21942	21942
18.77	21655	22254	21946	21946
18.78	21659	22256	21950	21949
18.79	21662	22260	21954	21953
18.8	21665	22265	21958	21957
18.81	21669	22269	21962	21961
18.82	21673	22272	21966	21965
18.83	21677	22277	21970	21969
18.84	21680	22280	21974	21972
18.85	21682	22284	21978	21976
18.86	21686	22287	21983	21980
18.87	21690	22291	21986	21984
18.88	21693	22295	21990	21988
18.89	21697	22300	21994	21992
18.9	21701	22304	21998	21996
18.91	21706	22309	22002	21999
18.92	21710	22311	22006	22003
18.93	21714	22313	22011	22007
18.94	21717	22318	22015	22011
18.95	21721	22322	22019	22015
18.96	21725	22327	22023	22018
18.97	21731	22329	22027	22022
18.98	21735	22332	22030	22026
18.99	21739	22335	22034	22030
19	21743	22338	22037	22033
19.01	21746	22342	22041	22037
19.02	21749	22345	22045	22041
19.03	21753	22350	22048	22044
19.04	21756	22352	22052	22048
19.05	21760	22356	22056	22051
19.06	21764	22359	22059	22055
19.07	21767	22362	22063	22059
19.08	21770	22364	22066	22062
19.09	21774	22367	22070	22066
19.1	21777	22370	22074	22069
19.11	21781	22373	22077	22073
19.12	21785	22377	22081	22077
19.13	21789	22382	22085	22080
19.14	21793	22383	22089	22084
19.15	21797	22387	22093	22087
19.16	21801	22390	22096	22091
19.17	21805	22394	22100	22095
19.18	21809	22397	22103	22098
19.19	21812	22400	22107	22102
19.2	21816	22406	22111	22106
19.21	21820	22408	22114	22109
19.22	21825	22410	22118	22113
19.23	21828	22413	22122	22116
19.24	21832	22416	22125	22120
19.25	21837	22419	22129	22124
19.26	21841	22423	22133	22127
19.27	21845	22426	22137	22131
19.28	21848	22428	22141	22135
19.29	21851	22432	22144	22138
19.3	21854	22435	22148	22142
19.31	21861	22439	22152	22146
19.32	21865	22442	22155	22149
19.33	21868	22445	22159	22153
19.34	21873	22449	22163	22156
19.35	21877	22452	22167	22160
19.36	21880	22455	22171	22164
19.37	21885	22458	22174	22167
19.38	21887	22461	22178	22171
19.39	21891	22464	22182	22174
19.4	21895	22467	22185	22178
19.41	21898	22471	22189	22182
19.42	21902	22474	22193	22185
19.43	21905	22478	22198	22189
19.44	21908	22481	22201	22193
19.45	21911	22485	22204	22196
19.46	21915	22488	22208	22200
19.47	21921	22491	22211	22204
19.48	21925	22494	22215	22207
19.49	21929	22497	22219	22211
19.5	21932	22501	22223	22215
19.51	21936	22504	22226	22218
19.52	21938	22507	22230	22222
19.53	21943	22509	22234	22225
19.54	21946	22511	22238	22229
19.55	21950	22516	22242	22233
19.56	21953	22518	22245	22236
19.57	21956	22521	22249	22240
19.58	21960	22526	22252	22244
19.59	21963	22529	22255	22247
19.6	21967	22534	22259	22251
19.61	21970	22537	22263	22255
19.62	21974	22539	22266	22258
19.63	21979	22541	22270	22262
19.64	21983	22545	22274	22266
19.65	21987	22548	22278	22269
19.66	21991	22551	22281	22273
19.67	21994	22554	22285	22276
19.68	21998	22557	22289	22280
19.69	22001	22559	22293	22284
19.7	22004	22563	22297	22287
19.71	22009	22565	22301	22291
19.72	22013	22568	22305	22294
19.73	22017	22571	22309	22298
19.74	22022	22575	22312	22302
19.75	22025	22579	22315	22305
19.76	22029	22582	22320	22309
19.77	22033	22586	22324	22312
19.78	22036	22589	22328	22316
19.79	22040	22593	22331	22320
19.8	22045	22598	22334	22323
19.81	22048	22600	22339	22327
19.82	22052	22604	22342	22331
19.83	22056	22607	22346	22334
19.84	22061	22610	22350	22338
19.85	22064	22613	22354	22341
19.86	22068	22616	22358	22345
19.87	22073	22619	22362	22349
19.88	22078	22622	22365	22352
19.89	22082	22626	22369	22356
19.9	22085	22630	22372	22360
19.91	22089	22633	22376	22363
19.92	22092	22636	22379	22367
19.93	22097	22639	22383	22370
19.94	22100	22643	22386	22374
19.95	22103	22646	22390	22377
[truncated: 5,932 more rows]
